# Supplementary material
Source: PubMed Central journal article supplement (PMC6364269)
Supplement: pr8b00576_si_002.pdf [file pr8b00576_si_002.pdf]

|    |              |          |                           |            |            | Group     | Control   |           |           |           |           |           |           |           |           |           |           |           |           |           |           |           |           |           |           |           |          |
|----|--------------|----------|---------------------------|------------|------------|-----------|-----------|-----------|-----------|-----------|-----------|-----------|-----------|-----------|-----------|-----------|-----------|-----------|-----------|-----------|-----------|-----------|-----------|-----------|-----------|-----------|----------|
|    |              |          |                           |            |            | Timepoint | 0         |           |           |           |           |           |           |           |           |           |           |           |           |           |           |           |           |           |           |           |          |
|    |              |          |                           |            |            | Replicate | 1         |           |           |           |           |           | 2         |           |           |           |           |           | 3         |           |           |           |           |           |           |           |          |
|    |              |          |                           |            |            | Technical | 1         | 2         | 3         | 4         | 5         | 6         | 1         | 2         | 3         | 4         | 5         | 6         | 1         | 2         | 3         | 4         | 5         | 6         | 1         | 2         |          |
| id | Multiplicity | Proteins | Positions within proteins | Gene names | Amino acid | Positions |           |           |           |           |           |           |           |           |           |           |           |           |           |           |           |           |           |           |           |           |          |
| 2  | 1            | A0AVK6   | 71                        | E2F8       | S          | 71        | -1.783469 | -1.191186 | -2.213828 | -1.415043 | -0.869174 | -1.494776 | -0.998854 | -0.737953 | -1.027137 | -1.218600 | -0.793388 | -1.457943 | -1.015317 | -0.830341 | -0.563085 | -1.272045 | -1.546039 | -1.275597 | -1.382522 | -0.94050  |          |
| 8  | 1            | A0FGR8   | 743                       | ESYT2      | S          | 743       | -1.107104 | -0.443604 | -1.498350 | -0.238571 | NaN       | -1.239566 | -0.543748 | -0.255396 | NaN       | 0.444807  | 0.832700  | -0.337644 | -0.761791 | NaN       | -0.629652 | 0.131500  | NaN       | -0.295433 | -1.575200 | -1.03014  |          |
| 10 | 1            | A0FGR8   | 758                       | ESYT2      | S          | 758       | 0.465521  | 1.791962  | -0.846705 | 0.181706  | 0.993765  | 0.469886  | 2.127157  | -1.871021 | NaN       | 2.026330  | 0.301231  | 0.444462  | -0.690347 | 0.171200  | 1.212418  | -0.505581 | -0.736461 | -0.409079 | -0.750992 | 0.81832   |          |
| 11 | 1            | A0FGR8   | 761                       | ESYT2      | S          | 761       | NaN       | -3.302289 | 4.524581  | -2.609413 | -1.461809 | -3.250309 | -1.075079 | -1.722097 | NaN       | -1.606898 | -1.490880 | -4.068188 | NaN       | NaN       | -3.374579 | 3.943294  | -3.305562 | NaN       | NaN       | NaN       |          |
| 13 | 1            | A0FGR8   | 691                       | ESYT2      | S          | 691       | 1.566273  | NaN       | 1.213826  | 0.492214  | 0.114009  | -0.096156 | NaN       | 2.995445  | 2.047554  | 1.281551  | NaN       | 0.782158  | 2.038123  | 2.113918  | 2.077424  | NaN       | -0.952639 | 0.969903  | 1.913406  | 2.078430  |          |
| 17 | 1            | A0JLT2   | 226                       | MED19      | S          | 226       | -1.518849 | -0.617806 | -1.264540 | NaN       | NaN       | NaN       | 0.265802  | -1.709081 | -0.490585 | NaN       | NaN       | NaN       | NaN       | -1.080192 | -1.032973 | NaN       | NaN       | NaN       | NaN       | -0.914199 | -1.78016 |
| 25 | 1            | A0MZ66   | 506                       | KIAA1598   | S          | 506       | 0.237654  | 0.562256  | 0.024644  | -0.212820 | -0.166093 | 0.141901  | 0.335476  | 0.744205  | 0.474421  | 0.163316  | 0.166104  | -0.105315 | 0.352562  | 0.424407  | 0.567569  | 0.153105  | 0.218193  | -0.140957 | -0.188477 | -0.07402  |          |
| 30 | 1            | A1A4S6   | 589                       | ARHGAP10   | S          | 589       | -1.209411 | NaN       | NaN       | NaN       | NaN       | -2.641503 | -0.815178 | NaN       | NaN       | NaN       | NaN       | NaN       | -1.249890 | NaN       |          |
| 33 | 1            | A1KXE4   | 6                         | FAM168B    | S          | 6         | 1.988531  | 2.065086  | 1.647753  | 0.824149  | 0.994644  | 0.824661  | 2.146153  | 2.311096  | 2.052658  | 1.441699  | 1.233541  | 1.008513  | 2.283122  | 2.082945  | 2.131567  | NaN       | 0.855461  | 0.759471  | 2.207515  | 2.01152   |          |
| 36 | 1            | A1L020   | 308                       | MEX3A      | S          | 308       | -1.141672 | -0.769269 | -0.815891 | -0.228632 | -0.505476 | -1.236798 | -1.096367 | -1.763534 | -1.854605 | -0.560753 | -1.948608 | -0.606286 | -1.183714 | -0.892058 | NaN       | -0.223783 | -2.290048 | -2.108042 | -0.734280 | NaN       |          |
| 37 | 1            | A1L020   | 338                       | MEX3A      | S          | 338       | -0.970724 | -0.405386 | -0.805029 | -1.705064 | -2.398594 | -2.734957 | -2.053031 | -1.862262 | -1.865367 | NaN       | NaN       | -2.989544 | -1.418805 | -2.083799 | -1.294654 | NaN       | NaN       | -2.704612 | 0.199623  | -0.03896  |          |
| 47 | 1            | A2RU30   | 7                         | TESPA1     | S          | 7         | -0.075706 | -0.090581 | -0.351210 | -0.914199 | -0.572160 | -1.117348 | 0.676513  | NaN       | NaN       | -0.404644 | -0.735725 | -0.708159 | 0.123099  | NaN       | -0.598823 | NaN       | -0.671264 | -0.674992 | -0.149765 | -0.05605  |          |
| 49 | 1            | A2RU30   | 334                       | TESPA1     | S          | 334       | NaN       | NaN       | NaN       | -1.847176 | NaN       | -2.204580 | NaN       | -1.710309 | NaN       | NaN       | -0.622706 | NaN      |
| 50 | 1            | A2RU30   | 454                       | TESPA1     | S          | 454       | 1.873952  | 1.437421  | 1.796914  | 1.782112  | 1.723993  | 1.790118  | 1.536986  | 1.797238  | 1.477422  | 1.672080  | 1.931623  | 1.515707  | 1.940189  | 1.706662  | 1.890338  | 1.603017  | 1.583252  | 1.497150  | 1.865264  | 1.670880  |          |
| 53 | 1            | A2RU67   | 62                        | KIAA1467   | S          | 62        | NaN       | NaN       | NaN       | -1.598628 | 0.425577  | -1.271985 | 1.831409  | NaN       | NaN       | 1.560660  | 0.113905  | -1.333447 | NaN       | NaN       | NaN       | -2.081692 | -0.117954 | NaN       | NaN       | -0.92388  |          |
| 54 | 1            | A3KN83   | 794                       | SBNO1      | S          | 794       | -3.330665 | -3.743895 | -1.191839 | -3.375980 | -2.145983 | -2.894562 | -0.968818 | -1.812238 | -2.914907 | -1.396478 | -1.815482 | -2.673802 | -3.312430 | -2.041202 | -0.967483 | -3.289048 | -2.889245 | -4.036633 | 0.437444  | 1.28259   |          |
| 62 | 1            | A3KN83   | 815                       | SBNO1      | S          | 815       | 0.604288  | 0.420790  | 0.331729  | NaN       | NaN       | NaN       | -0.429968 | 0.895122  | 0.781906  | NaN       | NaN       | NaN       | -0.059588 | NaN       | -2.385437 | NaN       | NaN       | -2.036591 | 2.013769  | 1.99704   |          |
| 66 | 1            | A4D1P6   | 269                       | WDR91      | S          | 269       | -5.090339 | -3.989351 | -3.481805 | -4.618415 | -3.908689 | -3.798179 | -4.442609 | -3.887869 | -4.217912 | -3.906082 | -3.713750 | -4.056361 | -5.060473 | -4.014634 | -4.103973 | -4.951811 | -4.676281 | NaN       | -4.067293 | NaN       |          |
| 67 | 1            | A5PL33   | 253                       | KRBA1      | S          | 253       | -2.103513 | -1.588020 | -2.468522 | -2.237417 | -2.028956 | -2.799827 | -1.945038 | -2.029620 | -2.199895 | -2.893064 | -2.322320 | NaN       | -2.298468 | -2.294063 | -2.075971 | -2.641760 | -3.073160 | -2.615791 | -1.769338 | -1.56413  |          |
| 68 | 1            | A5PL33   | 493                       | KRBA1      | S          | 493       | -2.367283 | -2.597802 | -3.505992 | NaN       | -3.447735 | -3.656019 | -1.743140 | -1.250162 | NaN       | -1.952555 | -2.129173 | -2.339015 | -1.309033 | -1.396603 | -0.401964 | -2.608806 | -2.245502 | -2.563304 | -2.811287 | -1.97180  |          |
| 72 | 1            | A5PLL1   | 228                       | ANKRD34B   | S          | 228       | NaN       | NaN       | NaN       | -1.945452 | NaN       | -1.864163 | NaN       | NaN       | NaN       | -2.367821 | NaN       | -2.199249 | NaN       | NaN       |          |
| 73 | 1            | A6H8Y1   | 2227                      | BDP1       | S          | 2227      | 2.797163  | 3.197201  | -0.153467 | 3.227359  | 2.578388  | 2.994607  | 3.041278  | 1.204948  | 3.013795  | 3.007489  | 2.413162  | 2.247113  | 3.286752  | 2.385550  | 2.494585  | 2.977664  | 2.939583  | 2.854465  | 2.451826  | 2.93827   |          |
| 74 | 1            | A6NC98   | 1345                      | CCDC88B    | S          | 1345      | 0.612738  | 1.039975  | -0.270038 | NaN       | -0.915523 | -1.088924 | 0.469828  | 0.133487  | 0.228959  | -0.980653 | -1.493167 | NaN       | 0.185444  | -0.407456 | 0.002426  | 1.341619  | -2.129875 | -1.296111 | -1.097056 | -1.16756  |          |
| 75 | 1            | A6NC98   | 1475                      | CCDC88B    | S          | 1475      | -1.519223 | -1.360587 | -1.442290 | -1.122920 | -1.126612 | -1.141847 | -1.589152 | -1.162044 | -1.240811 | -1.240572 | -0.916976 | -1.175896 | -1.268603 | -1.209779 | -1.243850 | NaN       | -1.268497 | -1.041092 | -1.097189 | -1.51225  |          |
| 77 | 1            | A6NC98   | 597                       | CCDC88B    | S          | 597       | -0.888472 | -1.055934 | -1.879031 | NaN       | NaN       | NaN       | -0.196527 | -0.416152 | -3.241862 | NaN       | NaN       | NaN       | -1.379258 | -1.703399 | -1.519991 | NaN       | NaN       | NaN       | 0.556329  | 0.37453   |          |
